# Supplementary material for: Tumor immunity landscape in non-small cell lung cancer
Source: PeerJ. 2018 Mar 23;6:e4546. doi: 10.7717/peerj.4546 (PMC5868477; doi:10.7717/peerj.4546)
Supplement: Table S1 — TCGA Patient ID, CYT values and mutation load in four stratified patient groups. [file peerj-06-4546-s002.xlsx]

## Sheet: LUAD.100patient
PatientID	Mutation_Load	CYT(log2)	Group
TCGA-05-5425-01	705	9.1402	HighM_HighI
TCGA-44-2656-01	919	9.61085	HighM_HighI
TCGA-44-2657-01	492	9.83416	HighM_HighI
TCGA-44-3918-01	1172	10.2905	HighM_HighI
TCGA-44-6778-01	489	9.42958	HighM_HighI
TCGA-44-8119-01	741	9.11212	HighM_HighI
TCGA-44-A4SS-01	589	9.08267	HighM_HighI
TCGA-49-AAR4-01	714	10.3372	HighM_HighI
TCGA-50-5049-01	969	9.57385	HighM_HighI
TCGA-55-6969-01	476	9.15865	HighM_HighI
TCGA-55-7994-01	1900	9.65408	HighM_HighI
TCGA-55-7995-01	801	9.40351	HighM_HighI
TCGA-55-8089-01	1512	10.8721	HighM_HighI
TCGA-55-8092-01	703	9.02985	HighM_HighI
TCGA-55-8205-01	691	9.13656	HighM_HighI
TCGA-64-5778-01	590	9.55126	HighM_HighI
TCGA-64-5781-01	1342	10.2858	HighM_HighI
TCGA-69-7978-01	742	9.16083	HighM_HighI
TCGA-86-6851-01	1033	10.1286	HighM_HighI
TCGA-91-A4BC-01	552	11.073	HighM_HighI
TCGA-95-A4VN-01	608	9.29963	HighM_HighI
TCGA-99-8028-01	548	10.0289	HighM_HighI
TCGA-L9-A444-01	714	10.0193	HighM_HighI
TCGA-MP-A4T4-01	474	9.31531	HighM_HighI
TCGA-NJ-A4YQ-01	1395	9.30033	HighM_HighI
TCGA-05-4390-01	692	5.72174	HighM_LowI
TCGA-05-4405-01	452	6.57675	HighM_LowI
TCGA-44-5644-01	1140	6.40583	HighM_LowI
TCGA-44-8120-01	765	6.26565	HighM_LowI
TCGA-50-5946-01	809	5.95123	HighM_LowI
TCGA-53-A4EZ-01	663	6.39602	HighM_LowI
TCGA-55-1592-01	628	6.56156	HighM_LowI
TCGA-55-7570-01	472	6.31796	HighM_LowI
TCGA-55-8094-01	553	5.41494	HighM_LowI
TCGA-55-8616-01	939	6.09753	HighM_LowI
TCGA-62-A46O-01	1204	5.52945	HighM_LowI
TCGA-64-1679-01	616	4.8896	HighM_LowI
TCGA-64-5775-01	618	6.01755	HighM_LowI
TCGA-69-7979-01	1802	6.25354	HighM_LowI
TCGA-73-4668-01	511	5.59032	HighM_LowI
TCGA-75-6214-01	848	5.9298	HighM_LowI
TCGA-78-8662-01	1472	5.68699	HighM_LowI
TCGA-86-8073-01	1785	6.47636	HighM_LowI
TCGA-86-8279-01	644	4.90948	HighM_LowI
TCGA-95-7043-01	1278	5.62772	HighM_LowI
TCGA-97-7938-01	474	6.47335	HighM_LowI
TCGA-99-8025-01	591	5.88072	HighM_LowI
TCGA-L9-A7SV-01	2008	6.30176	HighM_LowI
TCGA-MN-A4N1-01	585	4.47627	HighM_LowI
TCGA-NJ-A4YF-01	782	5.84689	HighM_LowI
TCGA-05-5420-01	106	9.73023	LowM_HighI
TCGA-38-7271-01	70	9.82421	LowM_HighI
TCGA-44-2661-01	51	9.88937	LowM_HighI
TCGA-44-6779-01	117	9.69952	LowM_HighI
TCGA-49-4506-01	138	9.66034	LowM_HighI
TCGA-49-AAR3-01	160	9.50074	LowM_HighI
TCGA-50-5055-01	16	9.31702	LowM_HighI
TCGA-50-5068-01	109	9.49958	LowM_HighI
TCGA-50-8460-01	36	9.26199	LowM_HighI
TCGA-55-6712-01	191	9.22702	LowM_HighI
TCGA-55-6971-01	104	9.67021	LowM_HighI
TCGA-55-6978-01	32	10.0845	LowM_HighI
TCGA-55-8621-01	76	9.14589	LowM_HighI
TCGA-62-8402-01	73	9.79936	LowM_HighI
TCGA-73-7499-01	81	9.10374	LowM_HighI
TCGA-75-5122-01	164	10.3329	LowM_HighI
TCGA-78-8648-01	12	9.70574	LowM_HighI
TCGA-86-8359-01	197	9.17796	LowM_HighI
TCGA-86-8671-01	38	10.2348	LowM_HighI
TCGA-86-A4P8-01	1	9.4197	LowM_HighI
TCGA-97-7552-01	43	9.83275	LowM_HighI
TCGA-99-8033-01	208	9.88788	LowM_HighI
TCGA-99-AA5R-01	58	9.1847	LowM_HighI
TCGA-L9-A50W-01	41	8.9569	LowM_HighI
TCGA-MP-A4TJ-01	122	10.151	LowM_HighI
TCGA-05-5429-01	40	5.73443	LowM_LowI
TCGA-05-5715-01	144	5.96666	LowM_LowI
TCGA-38-4628-01	153	4.41188	LowM_LowI
TCGA-49-4512-01	54	5.74866	LowM_LowI
TCGA-50-5051-01	135	5.28852	LowM_LowI
TCGA-50-5932-01	91	5.98201	LowM_LowI
TCGA-50-5944-01	84	5.72532	LowM_LowI
TCGA-50-6591-01	68	3.81136	LowM_LowI
TCGA-50-6673-01	65	5.71523	LowM_LowI
TCGA-55-6981-01	60	5.22401	LowM_LowI
TCGA-55-7726-01	133	5.64636	LowM_LowI
TCGA-55-8087-01	35	5.77517	LowM_LowI
TCGA-55-8615-01	164	5.30161	LowM_LowI
TCGA-62-A46V-01	96	5.67913	LowM_LowI
TCGA-62-A470-01	152	5.31427	LowM_LowI
TCGA-69-7760-01	89	4.13444	LowM_LowI
TCGA-71-6725-01	69	4.59587	LowM_LowI
TCGA-73-4675-01	80	5.55619	LowM_LowI
TCGA-75-6207-01	68	5.72641	LowM_LowI
TCGA-86-7713-01	176	5.52959	LowM_LowI
TCGA-86-7714-01	96	5.13168	LowM_LowI
TCGA-86-8075-01	53	5.9618	LowM_LowI
TCGA-95-8494-01	125	5.56024	LowM_LowI
TCGA-MP-A4T8-01	149	5.79506	LowM_LowI
TCGA-NJ-A7XG-01	44	5.63135	LowM_LowI

## Sheet: LUSC.100patient
PatientID	Mutation_Load	CYT(log2)	Group
TCGA-21-1070-01	636	9.8223	0.46672
TCGA-21-5787-01	518	10.638	0.605894
TCGA-33-4566-01	1661	9.23193	0.225023
TCGA-33-4583-01	702	9.28715	-0.22482
TCGA-34-8454-01	694	9.56287	0.534849
TCGA-37-3783-01	466	9.42716	0.18636
TCGA-37-3792-01	1097	10.0134	0.950026
TCGA-37-4130-01	1326	11.6341	0.807821
TCGA-39-5011-01	771	9.96318	0.389287
TCGA-43-5668-01	818	9.225	0.684206
TCGA-51-6867-01	748	9.10012	-0.105424
TCGA-56-8625-01	653	9.51717	0.939413
TCGA-56-A62T-01	626	8.92347	-0.311161
TCGA-58-A46M-01	524	9.07177	-0.1497
TCGA-63-A5MM-01	1554	9.51541	0.662286
TCGA-66-2782-01	455	8.81844	0.0634518
TCGA-66-2785-01	1361	10.0053	0.508454
TCGA-68-A59J-01	461	9.20467	0.133139
TCGA-77-6842-01	452	10.3159	0.533354
TCGA-77-7465-01	484	8.79625	0.338169
TCGA-77-8136-01	534	9.81022	0.580025
TCGA-85-8071-01	474	8.93491	-0.319167
TCGA-85-A4CL-01	989	9.54355	0.234472
TCGA-85-A50Z-01	564	9.52928	-0.275431
TCGA-NC-A5HJ-01	487	9.61838	1.05236
TCGA-21-1079-01	2406	6.47024	-0.117355
TCGA-21-5783-01	517	5.652	-0.305364
TCGA-33-4586-01	460	6.41609	-0.497728
TCGA-33-AASB-01	462	5.21192	-0.268497
TCGA-34-2600-01	506	6.25888	-0.617212
TCGA-39-5040-01	624	6.18034	0.00572323
TCGA-43-A474-01	479	5.07851	-0.761876
TCGA-52-7810-01	537	5.00465	-0.734286
TCGA-56-7222-01	498	3.60928	-0.336154
TCGA-58-8390-01	462	6.63469	0.0784719
TCGA-63-A5MW-01	576	6.81778	-0.23856
TCGA-66-2756-01	601	6.73374	-0.312291
TCGA-6A-AB49-01	495	5.83145	-0.885594
TCGA-77-7141-01	784	5.92593	-0.228436
TCGA-77-7463-01	475	6.10827	-0.42031
TCGA-77-8140-01	454	6.19207	-0.518382
TCGA-77-A5G6-01	619	5.53641	-0.529373
TCGA-85-A5B5-01	482	5.68599	-0.406502
TCGA-90-7769-01	633	5.29198	-0.710383
TCGA-90-A4ED-01	2708	6.61387	-0.0272141
TCGA-94-8490-01	1285	6.81283	-0.572519
TCGA-NC-A5HD-01	586	6.51699	-0.808138
TCGA-NC-A5HG-01	777	4.56393	-0.82889
TCGA-NC-A5HI-01	552	6.31189	-0.643963
TCGA-NC-A5HP-01	535	4.69069	-0.58678
TCGA-18-3415-01	225	9.68755	0.0565142
TCGA-18-4721-01	207	9.88863	0.456532
TCGA-21-5784-01	233	8.79266	0.159818
TCGA-22-5474-01	111	9.34537	0.488573
TCGA-33-4589-01	134	9.86061	-0.0551982
TCGA-34-5234-01	216	9.34222	0.561181
TCGA-34-5241-01	237	9.20788	0.256409
TCGA-39-5022-01	225	9.90776	0.978209
TCGA-39-5029-01	166	8.73196	0.158767
TCGA-39-5035-01	175	9.4606	0.402472
TCGA-43-6773-01	68	8.85027	0.812839
TCGA-56-8201-01	217	9.20913	0.818237
TCGA-56-8309-01	156	9.02483	0.888615
TCGA-60-2697-01	13	9.00362	1.41174
TCGA-60-2709-01	217	8.76131	0.776441
TCGA-60-2711-01	152	8.85495	-0.0941885
TCGA-63-7020-01	221	9.08424	0.306024
TCGA-66-2794-01	186	10.3701	0.569075
TCGA-77-8131-01	79	8.82032	0.935963
TCGA-85-7699-01	209	8.87066	0.600153
TCGA-85-8048-01	236	9.24613	0.9421
TCGA-85-A513-01	30	8.82768	1.01405
TCGA-96-A4JL-01	72	9.28544	0.934088
TCGA-98-7454-01	239	9.26294	1.18613
TCGA-98-A53C-01	1	9.0897	1.44717
TCGA-21-1078-01	89	5.63279	-0.50649
TCGA-22-0944-01	148	5.15686	-0.464743
TCGA-34-8456-01	38	6.09415	0.0208357
TCGA-37-4129-01	6	3.37543	-0.819849
TCGA-43-3394-01	178	5.60292	-0.407588
TCGA-43-5670-01	161	4.61749	-0.497652
TCGA-43-7657-01	163	4.57315	-0.608306
TCGA-56-8083-01	201	3.33073	-0.192196
TCGA-56-8624-01	143	5.94249	0.111461
TCGA-56-A4BX-01	145	1.08564	-0.898019
TCGA-58-8392-01	156	6.14435	-0.561948
TCGA-60-2716-01	21	4.63304	-0.601194
TCGA-63-A5MY-01	213	3.64445	-1.08241
TCGA-66-2777-01	201	6.18392	0.370544
TCGA-77-6843-01	203	4.80246	-0.477366
TCGA-77-8130-01	215	5.10623	-0.164855
TCGA-77-8145-01	146	6.05221	-0.0173832
TCGA-77-8153-01	218	6.11404	-0.597571
TCGA-77-A5G7-01	126	5.9465	-0.691985
TCGA-85-8052-01	159	5.89945	0.041631
TCGA-85-8479-01	149	4.68859	-0.531798
TCGA-85-A512-01	197	5.08748	-0.274245
TCGA-98-A53J-01	143	6.00411	-0.343301
TCGA-LA-A7SW-01	114	5.07944	-0.421755
TCGA-O2-A52W-01	135	5.14283	-0.438907
